# Supplementary material
Source: PubMed Central journal article supplement (PMC9980495)
Supplement: Supplementary_Digital_Material1.pdf [file Supplementary_Digital_Material1.pdf]

SUPPLEMENTARY DIGITAL MATERIAL 1

Supplementary Table I.—Group scores, Between and within group differences for Function and Pain outcome measures#.

| Outcome                                         | Baseline            | End of Treatment<br>4wk | Follow-up 2mo       | 4wk - Baseline        | 2mo - Baseline        | 2mo - 4wk            |
|-------------------------------------------------|---------------------|-------------------------|---------------------|-----------------------|-----------------------|----------------------|
| <b>Primary Outcome</b>                          |                     |                         |                     |                       |                       |                      |
| <b>K-AKPS (0-100)<sup>a</sup></b>               |                     |                         |                     |                       |                       |                      |
| Group 1 (n=30)                                  | 74.1 (71.66, 76.54) | 94.1 (92.25, 96.09)     | 98.7 (97.38, 99.95) | 20.0 (17.95, 22.12)*  | 24.6 (22.39, 26.74)*  | 4.5 (3.43, 5.63)*    |
| Group 2 (n=30)                                  | 72.7 (69.89, 75.57) | 94.9 (93.19, 96.61)     | 98.9 (97.81, 99.99) | 22.1 (18.82, 25.51)*  | 26.2 (22.56, 29.77)*  |                      |
| Between Groups<br>dif.                          | 1.4 (-2.65, 5.38)   | -0.7 (-3.18, 1.65)      | -0.2 (-1.77, 1.30)  |                       |                       | 4 (2.32, 5.68)*      |
| <b>Secondary<br/>Outcomes</b>                   |                     |                         |                     |                       |                       |                      |
| <b>Worst Pain<br/>(VAS, 0-10cm)<sup>b</sup></b> |                     |                         |                     |                       |                       |                      |
| Group 1 (n=30)                                  | 5.73 (5.21, 6.24)   | 1.30 (0.91, 1.68)       | 0.2 (0.06, 0.34)    | -4.43 (-4.85, -4.01)* | -5.53 (-6.03, -5.03)* | -1.1 (-1.46, -0.73)* |
| Group 2 (n=30)                                  | 5.40 (4.96, 5.85)   | 0.76 (0.48, 1.04)       | 0.07 (-0.004, 0.13) | -4.64 (-5.03, -4.26)* | -5.34 (-5.76, -4.91)* | -0.7 (-0.95, -0.44)* |
| Between Groups<br>dif.                          | 0.32 (-0.34, 0.99)  | 0.54 (0.07, 1.00)*      | 0.13 (-0.02, 0.28)  |                       |                       |                      |
| <b>Usual Pain<br/>(VAS, 0-10cm)<sup>b</sup></b> |                     |                         |                     |                       |                       |                      |
| Group 1 (n=30)                                  | 3.80 (3.39, 4.20)   | 0.40 (0.14, 0.65)       | 0.06 (-0.04, 0.16)  | -3.4 (-3.72, -3.08)*  | -3.73 (-4.12, -3.35)* | -0.3 (-0.57, -0.11)* |
| Group 2 (n=30)                                  | 3.64 (3.37, 3.91)   | 0.22 (0.07, 0.38)       | 0.01 (-0.003, 0.02) | -3.4 (-3.75, -3.09)*  | -3.64 (-3.91, -3.36)* | -0.2 (-0.37, -0.05)* |

|                                                  |                      |                     |                     |                       |                       |                       |
|--------------------------------------------------|----------------------|---------------------|---------------------|-----------------------|-----------------------|-----------------------|
| Between Groups dif.                              | 0.15 (-0.32, 0.63)   | 0.17 (-0.12, 0.47)  | 0.05 (-0.04, 0.15)  |                       |                       | 0.06)*                |
| <b>SLSQ-Shallow (VAS, 0-10cm)<sup>b</sup></b>    |                      |                     |                     |                       |                       |                       |
| Group 1 (n=30)                                   | 3.50 (3.20, 3.80)    | 0.21 (-0.04, 0.46)  | 0.05 (-0.02, 0.12)  | -3.28 (-3.59, -2.98)* | -3.44 (-3.71, -3.17)* | -0.16 (-0.35, 0.03)   |
| Group 2 (n=30)                                   | 3.35 (3.12, 3.59)    | 0.15 (0.02, 0.30)   | 0.01 (-0.01, 0.02)  | -3.21 (-3.45, -2.97)* | -3.35 (-3.57, -3.12)* | -0.14 (-0.26, -0.02)* |
| Between Groups dif.                              | 0.14 (-0.23, 0.50)   | 0.06 (-0.21, 0.33)  | -0.04 (-0.11, 0.03) |                       |                       |                       |
| <b>SLSQ-Deep (VAS, 0-10cm)<sup>b</sup></b>       |                      |                     |                     |                       |                       |                       |
| Group 1 (n=30)                                   | 4.84 (4.41, 5.28)    | 0.78 (0.34, 1.21)   | 0.14 (-0.01, 0.29)  | -4.06 (-4.49, -3.64)* | -4.70 (-5.13, -4.28)* | -0.64 (-0.96, -0.32)* |
| Group 2 (n=30)                                   | 4.46 (4.09, 4.83)    | 0.51 (0.22, 0.79)   | 0.05 (-0.01, 0.12)  | -3.95 (-4.31, -3.58)* | -4.40 (-4.75, -4.06)* | -0.45 (-0.69, -0.21)* |
| Between Groups dif.                              | 0.38 (-0.18, 0.94)   | 0.27 (-0.24, 0.78)  | 0.08 (-0.08, 0.25)  |                       |                       |                       |
| <b>DSDT-MPFFA (deg.<sup>o</sup>)<sup>a</sup></b> |                      |                     |                     |                       |                       |                       |
| Group 1 (n=30)                                   | 64.5 (62.36, 66.64)  | 91 (89.62, 92.38)   | 98.1 (96.73, 99.59) | 26.5 (24.14, 28.86)*  | 33.6 (30.03, 37.27)*  | 7.1 (4.72, 9.58)*     |
| Group 2 (n=30)                                   | 67.6 (65.56, 69.64)  | 90.6 (88.10, 93.24) | 96.8 (94.87, 98.75) | 23.1 (19.37, 26.75)*  | 29.2 (25.81, 32.61)*  | 6.1 (3.53, 8.76)*     |
| Between Groups dif.                              | -3.1 (-5.99, -0.20)* | 0.34 (-2.52, 3.19)  | 1.34 (-1.01, 3.70)  |                       |                       |                       |

K-AKPS: Kujala Anterior Knee Pain Scale, VAS: Visual Analog Scale, cm: centimeters, SLSQ: Single Leg Squat, deg.<sup>o</sup>: degrees, DSDT: Decline Step Down Test, MPFFA: Maximum Pain Free Flexion Angle, a. High score indicates better value, b. Low score indicates better value, # Values are presented as mean (95%CI), \*P<0.05.
