# Supplementary material
Source: PubMed Central journal article supplement (PMC9980495)
Supplement: Supplementary_Digital_Material2.pdf [file Supplementary_Digital_Material2.pdf]

SUPPLEMENTARY DIGITAL MATERIAL 2

Supplementary Table II.—Group scores, Between and within group differences for Kinesiophobia and Catastrophizing#.

| Secondary Outcomes                           | Baseline            | End of Treatment 4wk | Follow-up 2mo       | 4wk - Baseline          | 2mo - Baseline          | 2mo - 4wk            |
|----------------------------------------------|---------------------|----------------------|---------------------|-------------------------|-------------------------|----------------------|
| <b>Kinesiophobia TSK(17-68)<sup>b</sup></b>  |                     |                      |                     |                         |                         |                      |
| Group 1 (n=30)                               | 42.2 (39.68, 44.72) | 26.5 (24.75, 28.19)  | 21.3 (19.50, 23.10) | -15.7 (-18.59, -12.89)* | -20.9 (-24.42, -17.37)* | -5.2 (-6.47, -3.86)* |
| Group 2 (n=30)                               | 39.2 (36.82, 41.58) | 26.8 (24.72, 28.88)  | 22 (20.45, 23.62)   | -12.4 (-14.66, -10.14)* | -17.2 (-20.05, -14.29)* | -4.7 (-6.52, -3.01)* |
| Between Groups dif.                          | 3 (-0.39, 6.39)     | -0.33 (-2.98, 2.31)  | 0.7 (-3.08, 1.62)   |                         |                         |                      |
| <b>Catastrophizing PCS(0-52)<sup>b</sup></b> |                     |                      |                     |                         |                         |                      |
| Group 1 (n=30)                               | 16.8 (14.35, 19.25) | 3.6 (2.38, 4.88)     | 1.5 (0.59, 2.41)    | -13.2 (-15.78, -10.55)* | -15.3 (-18.11, -12.48)* | -2.1 (-2.79, -1.48)* |
| Group 2 (n=30)                               | 14.5 (12.29, 16.70) | 4.1 (2.81, 5.39)     | 1.5 (0.68, 2.25)    | -10.4 (-12.10, -7.80)*  | -13.0 (-15.72, -10.35)* | -2.6 (-3.74, -1.53)* |
| Between Groups dif.                          | 2.3 (-0.92, 5.52)   | -4.7 (-2.22, 1.29)   | 0.03 (-1.14, 1.21)  |                         |                         |                      |
| <b>Rumination PCS (0-16)<sup>b</sup></b>     |                     |                      |                     |                         |                         |                      |
| Group 1 (n=30)                               | 6.5 (5.70, 7.30)    | 1.3 (0.73, 1.80)     | 0.4 (0.08, 0.65)    | -5.2 (-6.29, -4.18)*    | -6.1 (-7.16, -5.11)*    | -0.9 (-1.44, -0.36)* |
| Group 2 (n=30)                               | 5.0 (4.29, 5.71)    | 1.4 (0.78, 2.09)     | 0.4 (0.06, 0.67)    | -3.5 (-4.48, -2.66)*    | -4.6 (-5.49, -3.78)*    | -1.0 (-1.71, -0.29)* |

|                                             |                   |                    |                    |                      |                      |                      |
|---------------------------------------------|-------------------|--------------------|--------------------|----------------------|----------------------|----------------------|
| Between Groups dif.                         | 1.5 (0.45, 2.55)* | -0.7 (-0.10, 0.66) | 0.0 (-0.41, 0.41)  |                      |                      | 0.42)*               |
| <b>Magnification PCS (0-12)<sup>b</sup></b> |                   |                    |                    |                      |                      |                      |
| Group 1 (n=30)                              | 3.8 (3.32, 4.28)  | 1.2 (0.83, 1.51)   | 0.5 (0.21, 0.79)   | -2.6 (-3.14, -2.12)* | -3.3 (-3.86, -2.74)* | -0.7 (-0.97, -0.36)* |
| Group 2 (n=30)                              | 3.7 (2.94, 4.52)  | 1.2 (0.91, 1.62)   | 0.7 (0.42, 1.04)   | -2.5 (-3.46, -1.47)* | -3.0 (-3.95, -2.05)* | -0.5 (-0.93, -0.13)* |
| Between Groups dif.                         | 0.7(-0.84, 0.97)  | -0.1 (-0.58, 0.38) | -0.2 (-0.65, 0.18) |                      |                      |                      |
| <b>Helplessness PCS (0-24)<sup>b</sup></b>  |                   |                    |                    |                      |                      |                      |
| Group 1 (n=30)                              | 6.5 (5.06, 7.94)  | 1.3 (0.58, 2.08)   | 0.6 (0.01, 1.33)   | -5.1 (-6.56, -3.77)* | -5.8 (-7.44, -4.22)* | -0.6 (-0.99, -0.34)* |
| Group 2 (n=30)                              | 5.6 (4.60, 6.93)  | 1.5 (1.01, 2.06)   | 0.3 (0.06, 0.67)   | -4.2 (-5.53, -2.94)* | -5.4 (-6.81, -3.99)* | -1.1 (-1.76, -0.57)* |
| Between Groups dif.                         | 0.7 (-1.08, 2.54) | -0.2 (-1.10, 0.70) | 0.3 (-0.41, 1.01)  |                      |                      |                      |

TSK:Tampa Scale Kinesiophobia, PCS:Pain Catastrophizing Scale

b. Low score indicates better value, # Values are presented as mean (95%CI), \* P<0.05.
